# Supplementary material for: Kinetics of Plasmodium midgut invasion in Anopheles mosquitoes
Source: PubMed Central journal article supplement (PMC7526910; doi:10.1371/journal.ppat.1008739), 2020-09-18
Supplement: ppat.1008739.s015.pdf [file ppat.1008739.s015.pdf]

**Table S3.** Kruskal-Wallis test of differences in ookinete localization between *A. gambiae* (*Ag*) and *A. gambiae* with silenced *TEP1* (*Ag<sup>TEP1KD</sup>*) at the indicated time points post infection (hpi).

| Ookinete distribution | Kruskal Wallis test          |                            |                |
|-----------------------|------------------------------|----------------------------|----------------|
|                       | <i>Ag</i>                    | <i>Ag<sup>TEP1KD</sup></i> | <i>P</i> value |
| <b>18-20 hpi</b>      |                              |                            |                |
| blood Meal            | ns                           | ns                         | 0.2186         |
| cell Layer            | < <i>Ag<sup>TEP1KD</sup></i> | > <i>Ag</i>                | 0.0418         |
| basal Lamina          | ns                           | ns                         | 0.8842         |
| <b>21-23 hpi</b>      |                              |                            |                |
| blood Meal            | > <i>Ag<sup>TEP1KD</sup></i> | < <i>Ag</i>                | 0.064          |
| cell Layer            | < <i>Ag<sup>TEP1KD</sup></i> | > <i>Ag</i>                | 0.0826         |
| basal Lamina          | ns                           | ns                         | 0.4561         |
| <b>22-25 hpi</b>      |                              |                            |                |
| blood Meal            | > <i>Ag<sup>TEP1KD</sup></i> | < <i>Ag</i>                | 0.0049         |
| cell Layer            | < <i>Ag<sup>TEP1KD</sup></i> | > <i>Ag</i>                | 0.0217         |
| basal Lamina          | ns                           | ns                         | 0.5752         |
