# Supplementary material for: Kinetics of Plasmodium midgut invasion in Anopheles mosquitoes
Source: PubMed Central journal article supplement (PMC7526910; doi:10.1371/journal.ppat.1008739), 2020-09-18
Supplement: ppat.1008739.s018.pdf [file ppat.1008739.s018.pdf]

**Table S6.** Kruskal-Wallis test of differences in parasite fluorescence intensities in *A. stephensi* (As), *A. gambiae* (Ag) and *A. gambiae* silenced for *TEP1* (*Ag<sup>TEP1KD</sup>*) between the indicated time points after infection (hpi).

| Ookinete fluorescence intensity |                           |                          |                          | Kruskal Wallis test |
|---------------------------------|---------------------------|--------------------------|--------------------------|---------------------|
|                                 | 18-20 hpi                 | 21-23 hpi                | 24-25 hpi                | P value             |
| <b>As</b>                       |                           |                          |                          |                     |
| blood meal                      | >24-25 hpi<br><21-23 hpi  | >18-20 hpi<br>>24-25 hpi | <18-20 hpi<br><21-23 hpi |                     |
| cell layer                      | >24-25 hpi                | ns                       | <18-20 hpi               | 0.01                |
| basal lamina                    | >24-25 hpi                | ns                       | <18-20 hpi               | 0.037               |
| <b>Ag</b>                       |                           |                          |                          |                     |
| blood meal                      | <21-23 hpi<br>< 24-25 hpi | >18-20 hpi               | >18-20 hpi               | 1.29E-08            |
| cell layer                      | <21-23 hpi                | >18-20 hpi               | ns                       | 0.045               |
| basal lamina                    | ns                        | ns                       | ns                       | 0.1171              |
| <b>Ag<sup>TEP1KD</sup></b>      |                           |                          |                          |                     |
| blood meal                      | ns                        | ns                       | ns                       | 0.313               |
| cell layer                      | ns                        | >24-25 hpi               | <21-23 hpi               | 0.008               |
| basal lamina                    | ns                        | ns                       | ns                       | 0.648               |
